# Supplementary material
Source: HighWire-hosted journal article supplement (https://bmjopen.bmj.com/content/9/7/e029051)
Supplement: inline-supplementary-material-1 [file inline-supplementary-material-1.pdf]

## Appendix A – Scoping Review Search Strategy

**Figure 2. Search terms for EMBASE (from January 1, 1998, to November 2018)**

| #   | Search term(s)                                                                                                                                                           |
|-----|--------------------------------------------------------------------------------------------------------------------------------------------------------------------------|
| S1  | <i>prehospital AND ('bleeding'/exp OR 'bleeding' OR 'bleeding'/exp OR bleeding) AND ('control'/exp OR 'control' OR 'control'/exp OR control) AND [1998-2018]/py</i>      |
| S2  | " AND 'layperson' AND [1998-2018]/py                                                                                                                                     |
| S3  | " AND 'education' AND [1998-2018]/py                                                                                                                                     |
| S4  | " AND 'urban area' AND [1998-2018]/py                                                                                                                                    |
| S5  | " AND 'rural area' AND [1998-2018]/py                                                                                                                                    |
| S6  | " AND 'tourniquet' AND [1998-2018]/py                                                                                                                                    |
| S7  | " AND 'occlusive dressing' AND [1998-2018]/py                                                                                                                            |
| S8  | " AND 'hemostatic agent' AND [1998-2018]/py                                                                                                                              |
| S9  | " AND 'prevention and control' AND [1998-2018]/py                                                                                                                        |
| S10 | " AND 'military medicine' AND [1998-2018]/py                                                                                                                             |
| S11 | " AND 'mass disaster' AND [1998-2018]/py                                                                                                                                 |
| S12 | " AND 'civilian' AND [1998-2018]/py                                                                                                                                      |
| S13 | " AND 'rescue personnel' AND [1998-2018]/py                                                                                                                              |
| S14 | " AND 'law enforcement' AND [1998-2018]/py                                                                                                                               |
| S15 | " AND 'limb injury' AND [1998-2018]/py                                                                                                                                   |
| S16 | " AND 'injury' AND [1998-2018]/py                                                                                                                                        |
| S17 | " AND 'exsanguination' AND [1998-2018]/py                                                                                                                                |
| S18 | " AND 'global health' AND [1998-2018]/py                                                                                                                                 |
| S19 | " AND 'united states' AND [1998-2018]/py                                                                                                                                 |
| S20 | " AND 'developed country' AND [1998-2018]/py                                                                                                                             |
| S21 | " AND 'developing country' AND [1998-2018]/py                                                                                                                            |
| S22 | " AND 'wound' AND [1998-2018]/py                                                                                                                                         |
| S23 | #1 OR #2 OR #3 OR #4 OR #5 OR #6 OR #7 OR #8 OR #9 OR #10 OR #11 OR #12 OR #13 OR #14 OR #15 OR #16 OR #17 OR #18 OR #19 OR #20 OR #21 OR #22                            |
| S24 | <i>'emergency care' AND ('bleeding'/exp OR 'bleeding' OR 'bleeding'/exp OR bleeding) AND ('control'/exp OR 'control' OR 'control'/exp OR control) AND [1998-2018]/py</i> |
| S25 | " AND 'layperson' AND [1998-2018]/py                                                                                                                                     |
| S26 | " AND 'education' AND [1998-2018]/py                                                                                                                                     |
| S27 | " AND 'urban area' AND [1998-2018]/py                                                                                                                                    |
| S28 | " AND 'rural area' AND [1998-2018]/py                                                                                                                                    |
| S29 | " AND 'tourniquet' AND [1998-2018]/py                                                                                                                                    |
| S30 | " AND 'occlusive dressing' AND [1998-2018]/py                                                                                                                            |
| S31 | " AND 'hemostatic agent' AND [1998-2018]/py                                                                                                                              |
| S32 | " AND 'prevention and control' AND [1998-2018]/py                                                                                                                        |
| S33 | " AND 'military medicine' AND [1998-2018]/py                                                                                                                             |
| S34 | " AND 'mass disaster' AND [1998-2018]/py                                                                                                                                 |

|     |                                                                                                                                                        |
|-----|--------------------------------------------------------------------------------------------------------------------------------------------------------|
| S35 | " AND 'civilian' AND [1998-2018]/py                                                                                                                    |
| S36 | " AND 'rescue personnel' AND [1998-2018]/py                                                                                                            |
| S37 | " 'law enforcement' AND [1998-2018]/py                                                                                                                 |
| S38 | " AND 'limb injury' AND [1998-2018]/py                                                                                                                 |
| S39 | " AND 'injury' AND [1998-2018]/py                                                                                                                      |
| S40 | " AND 'wound' AND [1998-2018]/py                                                                                                                       |
| S41 | " AND 'exsanguination' AND [1998-2018]/py                                                                                                              |
| S42 | " AND 'global health' AND [1998-2018]/py                                                                                                               |
| S43 | " AND 'united states' AND [1998-2018]/py                                                                                                               |
| S44 | " AND 'developed country' AND [1998-2018]/py                                                                                                           |
| S45 | " AND 'developing country' AND [1998-2018]/py                                                                                                          |
| S46 | #24 OR #25 OR #26 OR #27 OR #28 OR #29 OR #30 OR #31 OR #32 OR #33 OR #34 OR #35 OR #36 OR #37 OR #38 OR #39 OR #40 OR #41 OR #42 OR #43 OR #44 OR #45 |
| S47 | #23 OR #46                                                                                                                                             |

**Figure 3. Search terms for MeSH (from January 1, 1998, to November 2018) via PubMed.**

| #   | Search term(s)                                                                                                                                                                                                                                                                                                                                  |
|-----|-------------------------------------------------------------------------------------------------------------------------------------------------------------------------------------------------------------------------------------------------------------------------------------------------------------------------------------------------|
| S1  | (( <i>"Emergency Medical Services"</i> [Mesh]) AND <i>"Hemorrhage"</i> [Mesh])                                                                                                                                                                                                                                                                  |
| S2  | " AND "prevention and control"[subheading]                                                                                                                                                                                                                                                                                                      |
| S3  | " AND ("Education"[Mesh] OR "Education, Public Health Professional"[Mesh] OR "Education, Professional"[Mesh] OR "Education, Nonprofessional"[Mesh])                                                                                                                                                                                             |
| S4  | " AND ("Urban Health Services"[Mesh] OR "Urban Health"[Mesh] OR "Urban Population"[Mesh])                                                                                                                                                                                                                                                       |
| S5  | " AND ("Rural Population"[Mesh] OR "Rural Health Services"[Mesh])                                                                                                                                                                                                                                                                               |
| S6  | " AND "Tourniquets"[Mesh]                                                                                                                                                                                                                                                                                                                       |
| S7  | " AND "Occlusive Dressing"[Mesh]                                                                                                                                                                                                                                                                                                                |
| S8  | " AND ("Hemostatics"[Mesh] OR "Hemostatic Techniques"[Mesh] OR "Fibrin Tissue Adhesive"[Mesh])                                                                                                                                                                                                                                                  |
| S9  | " AND ("Military Personnel"[Mesh] OR "Military Medicine"[Mesh])                                                                                                                                                                                                                                                                                 |
| S10 | " AND ("Emergency Responders"[Mesh] OR "Emergency Medical Technicians"[Mesh])                                                                                                                                                                                                                                                                   |
| S11 | " AND ("Law Enforcement"[Mesh] OR "Police"[Mesh])                                                                                                                                                                                                                                                                                               |
| S12 | " AND ("Extremities"[Mesh] AND "Wounds and Injuries"[Mesh])                                                                                                                                                                                                                                                                                     |
| S13 | " AND ("Global Health"[Mesh] OR "World Health Organization"[Mesh])                                                                                                                                                                                                                                                                              |
| S14 | " AND ("United States"[Mesh] OR "United States Agency for Healthcare Research and Quality"[Mesh] OR "United States Public Health Service"[Mesh] OR "United States Health Resources and Services Administration"[Mesh] OR "United States Dept. of Health and Human Services"[Mesh] OR "National Center for Health Care Technology (U.S.)"[Mesh]) |
| S15 | " AND ("Health Transition"[Mesh] OR "Developed Countries"[Mesh] OR "Developing Countries"[Mesh])                                                                                                                                                                                                                                                |
| S16 | (( <i>"Emergency Medical Services"</i> [Mesh]) AND <i>"Shock, Hemorrhagic"</i> [Mesh])                                                                                                                                                                                                                                                          |
| S17 | " AND "prevention and control"[subheading]                                                                                                                                                                                                                                                                                                      |

|     |                                                                                                                                                                                                                                                                                                                                                 |
|-----|-------------------------------------------------------------------------------------------------------------------------------------------------------------------------------------------------------------------------------------------------------------------------------------------------------------------------------------------------|
| S18 | " AND ("Education"[Mesh] OR "Education, Public Health Professional"[Mesh] OR "Education, Professional"[Mesh] OR "Education, Nonprofessional"[Mesh])                                                                                                                                                                                             |
| S19 | " AND ("Urban Health Services"[Mesh] OR "Urban Health"[Mesh] OR "Urban Population"[Mesh])                                                                                                                                                                                                                                                       |
| S20 | " AND ("Rural Population"[Mesh] OR "Rural Health Services"[Mesh])                                                                                                                                                                                                                                                                               |
| S21 | " AND "Tourniquets"[Mesh]                                                                                                                                                                                                                                                                                                                       |
| S22 | " AND "Occlusive Dressing"[Mesh]                                                                                                                                                                                                                                                                                                                |
| S23 | " AND ("Hemostatics"[Mesh] OR "Hemostatic Techniques"[Mesh] OR "Fibrin Tissue Adhesive"[Mesh])                                                                                                                                                                                                                                                  |
| S24 | " AND ("Military Personnel"[Mesh] OR "Military Medicine"[Mesh])                                                                                                                                                                                                                                                                                 |
| S25 | " AND ("Emergency Responders"[Mesh] OR "Emergency Medical Technicians"[Mesh])                                                                                                                                                                                                                                                                   |
| S26 | " AND ("Law Enforcement"[Mesh] OR "Police"[Mesh])                                                                                                                                                                                                                                                                                               |
| S27 | " AND ("Extremities"[Mesh] AND "Wounds and Injuries"[Mesh])                                                                                                                                                                                                                                                                                     |
| S28 | " AND ("Global Health"[Mesh] OR "World Health Organization"[Mesh])                                                                                                                                                                                                                                                                              |
| S29 | " AND ("United States"[Mesh] OR "United States Agency for Healthcare Research and Quality"[Mesh] OR "United States Public Health Service"[Mesh] OR "United States Health Resources and Services Administration"[Mesh] OR "United States Dept. of Health and Human Services"[Mesh] OR "National Center for Health Care Technology (U.S.)"[Mesh]) |
| S30 | " AND ("Health Transition"[Mesh] OR "Developed Countries"[Mesh] OR "Developing Countries"[Mesh])                                                                                                                                                                                                                                                |
| S31 | <i>(("Emergency Medical Services"[Mesh]) AND "Exsanguination" [Mesh])</i>                                                                                                                                                                                                                                                                       |
| S32 | " AND "prevention and control"[subheading]                                                                                                                                                                                                                                                                                                      |
| S33 | " AND ("Education"[Mesh] OR "Education, Public Health Professional"[Mesh] OR "Education, Professional"[Mesh] OR "Education, Nonprofessional"[Mesh])                                                                                                                                                                                             |
| S34 | " AND ("Urban Health Services"[Mesh] OR "Urban Health"[Mesh] OR "Urban Population"[Mesh])                                                                                                                                                                                                                                                       |
| S35 | " AND ("Rural Population"[Mesh] OR "Rural Health Services"[Mesh])                                                                                                                                                                                                                                                                               |
| S36 | " AND "Tourniquets"[Mesh]                                                                                                                                                                                                                                                                                                                       |
| S37 | " AND "Occlusive Dressing"[Mesh]                                                                                                                                                                                                                                                                                                                |
| S38 | " AND ("Hemostatics"[Mesh] OR "Hemostatic Techniques"[Mesh] OR "Fibrin Tissue Adhesive"[Mesh])                                                                                                                                                                                                                                                  |
| S39 | " AND ("Military Personnel"[Mesh] OR "Military Medicine"[Mesh])                                                                                                                                                                                                                                                                                 |
| S40 | " AND ("Emergency Responders"[Mesh] OR "Emergency Medical Technicians"[Mesh])                                                                                                                                                                                                                                                                   |
| S41 | " AND ("Law Enforcement"[Mesh] OR "Police"[Mesh])                                                                                                                                                                                                                                                                                               |
| S42 | " AND ("Extremities"[Mesh] AND "Wounds and Injuries"[Mesh])                                                                                                                                                                                                                                                                                     |
| S43 | " AND ("Global Health"[Mesh] OR "World Health Organization"[Mesh])                                                                                                                                                                                                                                                                              |
| S44 | " AND ("United States"[Mesh] OR "United States Agency for Healthcare Research and Quality"[Mesh] OR "United States Public Health Service"[Mesh] OR "United States Health Resources and Services Administration"[Mesh] OR "United States Dept. of Health and Human Services"[Mesh] OR "National Center for Health Care Technology (U.S.)"[Mesh]) |
| S45 | " AND ("Health Transition"[Mesh] OR "Developed Countries"[Mesh] OR "Developing Countries"[Mesh])                                                                                                                                                                                                                                                |

**Figure 4. Search terms for Web of Science (from January 1, 1998, to November 2018).**

| #   | Search term(s)                           |
|-----|------------------------------------------|
| S1  | <i>“Prehospital bleed* control*”</i>     |
| S2  | ” AND “prevent* and control*”            |
| S3  | ” AND “educat*”                          |
| S4  | ” AND “urban*”                           |
| S5  | ” AND “rural*”                           |
| S6  | ” AND “tourniquet*”                      |
| S7  | ” AND “occlusiv* dressing*”              |
| S8  | ” AND “hemosta*”                         |
| S9  | ” AND “militar*”                         |
| S10 | ” AND “emergency*”                       |
| S11 | ” AND “law enforcement”                  |
| S12 | ” AND “police”                           |
| S13 | ” AND “wound*”                           |
| S14 | ” AND “injur*”                           |
| S15 | ” AND “extremit*”                        |
| S16 | ” AND “global* health”                   |
| S17 | ” AND “world*”                           |
| S18 | ” AND “united states”                    |
| S19 | ” AND “develop* countr*”                 |
| S20 | <i>“Prehospital hemorrhag* control*”</i> |
| S21 | ” AND “prevent* and control*”            |
| S22 | ” AND “educat*”                          |
| S23 | ” AND “urban*”                           |
| S24 | ” AND “rural*”                           |
| S25 | ” AND “tourniquet*”                      |
| S26 | ” AND “occlusiv* dressing*”              |
| S27 | ” AND “hemosta*”                         |
| S28 | ” AND “militar*”                         |
| S29 | ” AND “emergency*”                       |
| S30 | ” AND “law enforcement”                  |
| S31 | ” AND “police”                           |
| S32 | ” AND “wound*”                           |
| S33 | ” AND “injur*”                           |
| S34 | ” AND “extremit*”                        |
| S35 | ” AND “global* health”                   |
| S36 | ” AND “world*”                           |
| S37 | ” AND “united states”                    |
| S38 | ” AND “develop* countr*”                 |

|     |                                                |
|-----|------------------------------------------------|
| S39 | <i>“Prehospital exsanguinat* control*”</i>     |
| S40 | ” AND “prevent* and control*”                  |
| S41 | ” AND “educat*”                                |
| S42 | ” AND “urban*”                                 |
| S43 | ” AND “rural*”                                 |
| S44 | ” AND “tourniquet*”                            |
| S45 | ” AND “occlusiv* dressing*”                    |
| S46 | ” AND “hemosta*”                               |
| S47 | ” AND “militar*”                               |
| S48 | ” AND “emergency*”                             |
| S49 | ” AND “law enforcement”                        |
| S50 | ” AND “police”                                 |
| S51 | ” AND “wound*”                                 |
| S52 | ” AND “injur*”                                 |
| S53 | ” AND “extremit*”                              |
| S54 | ” AND “global* health”                         |
| S55 | ” AND “world*”                                 |
| S56 | ” AND “united states”                          |
| S57 | ” AND “develop* countr*”                       |
| S58 | <i>“Prehospital hemorrhag* shock control*”</i> |
| S59 | ” AND “prevent* and control*”                  |
| S60 | ” AND “educat*”                                |
| S61 | ” AND “urban*”                                 |
| S62 | ” AND “rural*”                                 |
| S63 | ” AND “tourniquet*”                            |
| S64 | ” AND “occlusiv* dressing*”                    |
| S65 | ” AND “hemosta*”                               |
| S66 | ” AND “militar*”                               |
| S67 | ” AND “emergency*”                             |
| S68 | ” AND “law enforcement”                        |
| S69 | ” AND “police”                                 |
| S70 | ” AND “wound*”                                 |
| S71 | ” AND “injur*”                                 |
| S72 | ” AND “extremit*”                              |
| S73 | ” AND “global* health”                         |
| S74 | ” AND “world*”                                 |
| S75 | ” AND “united states”                          |
| S76 | ” AND “develop* countr*”                       |
